# Supplementary material for: Associations between Psychosocial Working Conditions and Quality of Care (i.e., Slips and Lapses, and Perceived Social Interactions with Patients)—A Cross-Sectional Study among Medical Assistants
Source: MDPI journal article supplement (doi:10.3390/ijerph18189693), 2021-09-15
Supplement: s1 [file s1]

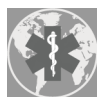

## Supplementary Material

**Table S1.** Intercorrelation table (Pearson correlation) for dependent and independent variables.

|        | SL      | IP      | Effort  | Reward  | ERI    | WL     | JC     | CB     | GF     | PO     | RS     | LS |
|--------|---------|---------|---------|---------|--------|--------|--------|--------|--------|--------|--------|----|
| SL     | 1       |         |         |         |        |        |        |        |        |        |        |    |
| IP     | ,283**  | 1       |         |         |        |        |        |        |        |        |        |    |
| Effort | ,101**  | ,346**  | 1       |         |        |        |        |        |        |        |        |    |
| Reward | -,138** | -,277** | -,319** | 1       |        |        |        |        |        |        |        |    |
| ERI    | ,133**  | ,349**  | ,712**  | -,832** | 1      |        |        |        |        |        |        |    |
| WL     | ,130**  | ,392**  | ,823**  | -,379** | ,638** | 1      |        |        |        |        |        |    |
| JC     | ,082*   | ,330**  | ,747**  | -,211** | ,501** | ,591** | 1      |        |        |        |        |    |
| CB     | ,157**  | ,310**  | ,408**  | -,655** | ,662** | ,461** | ,266** | 1      |        |        |        |    |
| GF     | ,081*   | ,186**  | ,254**  | -,828** | ,652** | ,284** | ,169** | ,393** | 1      |        |        |    |
| PO     | ,192**  | ,218**  | ,253**  | -,340** | ,340** | ,361** | ,158** | ,399** | ,152** | 1      |        |    |
| RS     | ,096**  | ,356**  | 0,052   | -,234** | ,174** | ,100** | -0,004 | ,231** | ,170** | ,177** | 1      |    |
| LS     | ,112**  | ,290**  | ,321**  | -,649** | ,568** | ,427** | ,244** | ,550** | ,429** | ,506** | ,197** | 1  |

\*\*  $p < 0.01$  (two-tailed), \*  $p < 0.05$  (two-tailed)

n with complete data on the respective variable and item

SL, Slips and lapses; IP, Interaction with patients; ERI, ERI ratio; WL, Workload; JC, Job control; CB, Collaboration; GF, Gratification; PO, Practice organization, RS, Resources; LS, Leadership

**Table S2.** Associations of psychosocial working conditions with slips and lapses or poor interaction with patients due to work stress among medical assistants (linear regression).

| Characteristic                   |                          | Slips and lapses <sup>a</sup> |       |         |                       |       |         | Poor interaction with patients <sup>a</sup> |       |         |                       |       |         |
|----------------------------------|--------------------------|-------------------------------|-------|---------|-----------------------|-------|---------|---------------------------------------------|-------|---------|-----------------------|-------|---------|
|                                  |                          | Model I <sup>b</sup>          |       |         | Model II <sup>c</sup> |       |         | Model I <sup>b</sup>                        |       |         | Model II <sup>c</sup> |       |         |
|                                  |                          | b                             | ß     | p-value | b                     | ß     | p-value | b                                           | ß     | p-value | b                     | ß     | p-value |
| ERI model                        |                          |                               |       |         |                       |       |         |                                             |       |         |                       |       |         |
| Effort (highest tertile vs rest) | High vs low <sup>d</sup> | 0.06                          | 0.03  | 0.396   | 0.11                  | 0.05  | 0.143   | 0.47                                        | 0.22  | 0.000   | 0.48                  | 0.22  | 0.000   |
| Reward (highest tertile vs rest) | High vs low              | -0.25                         | -0.12 | 0.001   | -0.23                 | -0.11 | 0.002   | -0.49                                       | -0.24 | 0.000   | -0.52                 | -0.25 | 0.000   |
| ERI ratio (>1.0 items vs rest)   | High vs low              | 0.31                          | 0.14  | 0.000   | 0.31                  | 0.14  | 0.000   | 0.70                                        | 0.31  | 0.000   | 0.70                  | 0.31  | 0.000   |
| MA-specific instrument           |                          |                               |       |         |                       |       |         |                                             |       |         |                       |       |         |
| Workload (high)                  | High vs low              | 0.18                          | 0.08  | 0.014   | 0.20                  | 0.10  | 0.006   | 0.56                                        | 0.27  | 0.000   | 0.56                  | 0.27  | 0.000   |
| Job control (low)                | High vs low              | 0.07                          | 0.03  | 0.348   | 0.14                  | 0.07  | 0.061   | 0.50                                        | 0.25  | 0.000   | 0.52                  | 0.25  | 0.000   |
| Collaboration (poor)             | High vs low              | 0.22                          | 0.10  | 0.002   | 0.22                  | 0.10  | 0.002   | 0.47                                        | 0.22  | 0.000   | 0.47                  | 0.22  | 0.000   |
| Gratification (low)              | High vs low              | 0.08                          | 0.04  | 0.274   | 0.06                  | 0.03  | 0.389   | 0.26                                        | 0.13  | 0.000   | 0.28                  | 0.14  | 0.000   |
| Practice organization (poor)     | High vs low              | 0.38                          | 0.18  | 0.000   | 0.39                  | 0.18  | 0.000   | 0.37                                        | 0.17  | 0.000   | 0.39                  | 0.18  | 0.000   |
| Resources (lack of)              | High vs low              | 0.28                          | 0.13  | 0.000   | 0.30                  | 0.14  | 0.000   | e                                           |       |         | e                     |       |         |
| Leadership (poor behavior)       | High vs low              | 0.12                          | 0.05  | 0.132   | 0.11                  | 0.05  | 0.163   | 0.43                                        | 0.19  | 0.000   | 0.44                  | 0.20  | 0.000   |

Effort-reward imbalance questionnaire (ERI) or medical assistant (MA)-specific work stress questionnaire

Quality of care MA-specific questionnaire

<sup>a</sup> Outcome variables used as z-scores<sup>b</sup> Unadjusted<sup>c</sup> Additionally adjusted for age, gender and leadership position<sup>d</sup> Exposure variables are dichotomized based on highest tertile vs remaining tertiles (high vs. low)<sup>e</sup> Subscale “resources” removed from analyses for “poor interaction with patients” due to conceptual overlaps

**Table S3.** Associations of psychosocial working conditions (z-scores) with slips and lapse or poor interaction with patients due to work stress among medical assistants (linear regression).

| Characteristic                   |         | Slips and lapses <sup>a</sup> |      |         |                       |      |         | Poor interaction with patients <sup>a</sup> |      |         |                       |      |         |
|----------------------------------|---------|-------------------------------|------|---------|-----------------------|------|---------|---------------------------------------------|------|---------|-----------------------|------|---------|
|                                  |         | Model I <sup>b</sup>          |      |         | Model II <sup>c</sup> |      |         | Model I <sup>b</sup>                        |      |         | Model II <sup>c</sup> |      |         |
|                                  |         | b                             | ß    | p-value | b                     | ß    | p-value | b                                           | ß    | p-value | b                     | ß    | p-value |
| ERI model                        |         |                               |      |         |                       |      |         |                                             |      |         |                       |      |         |
| Effort (highest tertile vs rest) | z-score | 0.10                          | 0.10 | 0.003   | 0.12                  | 0.12 | 0.000   | 0.35                                        | 0.35 | 0.000   | 0.35                  | 0.35 | 0.000   |
| Reward (highest tertile vs rest) | z-score | -                             | -    | 0.000   | -                     | -    | 0.000   | -                                           | -    | 0.000   | -                     | -    | 0.000   |
|                                  |         | 0.14                          | 0.14 |         | 0.13                  | 0.13 |         | 0.28                                        | 0.28 |         | 0.29                  | 0.29 |         |
| ERI ratio (>1.0 items vs rest)   | z-score | 0.13                          | 0.13 | 0.000   | 0.14                  | 0.14 | 0.000   | 0.35                                        | 0.35 | 0.000   | 0.35                  | 0.35 | 0.000   |
| MA-specific instrument           |         |                               |      |         |                       |      |         |                                             |      |         |                       |      |         |
| Workload (high)                  | z-score | 0.13                          | 0.13 | 0.000   | 0.14                  | 0.14 | 0.000   | 0.39                                        | 0.39 | 0.000   | 0.39                  | 0.39 | 0.000   |
| Job control (low)                | z-score | 0.08                          | 0.08 | 0.015   | 0.13                  | 0.13 | 0.000   | 0.33                                        | 0.33 | 0.000   | 0.34                  | 0.34 | 0.000   |
| Collaboration (poor)             | z-score | 0.16                          | 0.16 | 0.000   | 0.16                  | 0.16 | 0.000   | 0.31                                        | 0.31 | 0.000   | 0.31                  | 0.31 | 0.000   |
| Gratification (low)              | z-score | 0.08                          | 0.08 | 0.017   | 0.07                  | 0.07 | 0.034   | 0.19                                        | 0.19 | 0.000   | 0.20                  | 0.20 | 0.000   |
| Practice organization (poor)     | z-score | 0.19                          | 0.19 | 0.000   | 0.19                  | 0.19 | 0.000   | 0.22                                        | 0.22 | 0.000   | 0.23                  | 0.23 | 0.000   |
| Resources (lack of)              | z-score | 0.10                          | 0.10 | 0.005   | 0.10                  | 0.10 | 0.004   | <sup>d</sup>                                |      |         | <sup>d</sup>          |      |         |
| Leadership (poor behavior)       | z-score | 0.11                          | 0.11 | 0.001   | 0.12                  | 0.12 | 0.001   | 0.29                                        | 0.29 | 0.000   | 0.30                  | 0.30 | 0.000   |

Effort-reward imbalance questionnaire (ERI) or medical assistant (MA)-specific work stress questionnaire

Quality of care MA-specific questionnaire

<sup>a</sup> Outcome variables used as z-scores<sup>b</sup> Unadjusted<sup>c</sup> Additionally adjusted for age, gender and leadership position<sup>d</sup> Subscale “resources” removed from analyses for “poor interaction with patients” due to conceptual overlaps
